# Supplementary material for: Development of a Novel Magnetic-Bead-Based Automated Strategy for Efficient and Low-Cost Sample Preparation for Ochratoxin A Detection Using Mycotoxin–Albumin Interaction
Source: MDPI journal article supplement (doi:10.3390/toxins15040270), 2023-04-05
Supplement: s1 [file s1]

Supplementary Materials

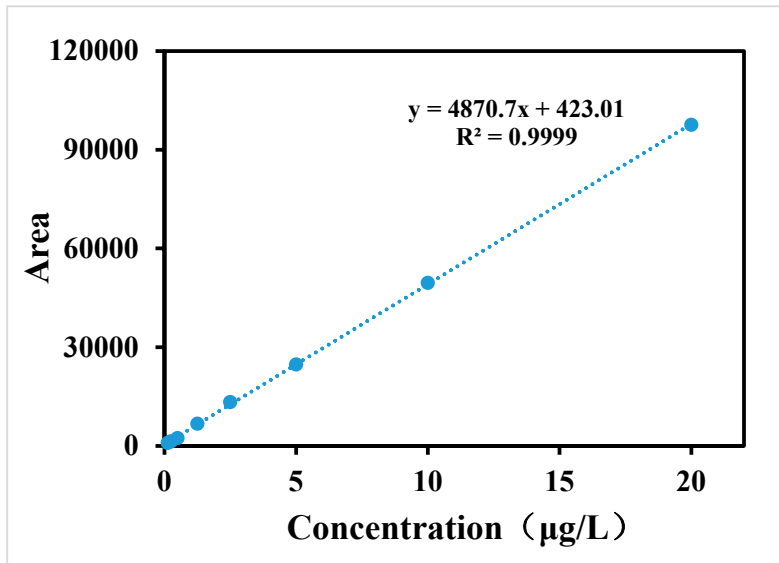

Figure S1. The calibration curve

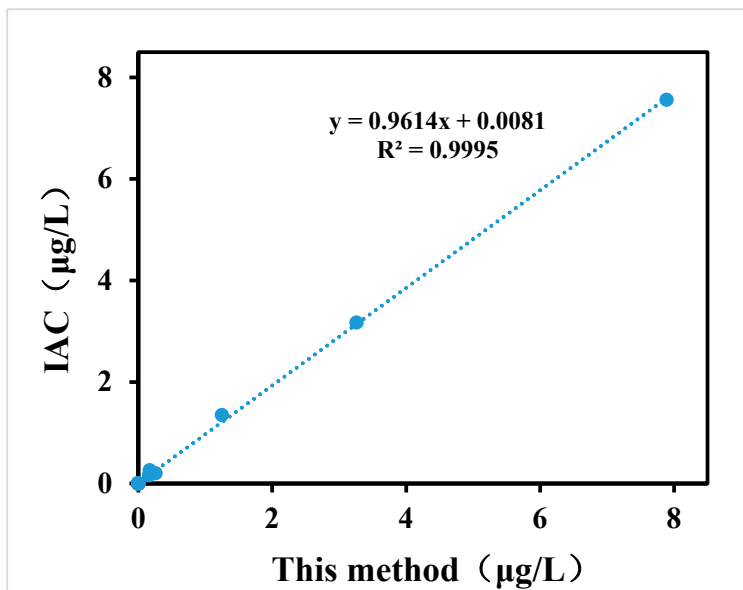

Figure S2. Comparison on the determination of OTA in real samples between this method and IAC.
